# Supplementary material for: Oral etoposide and trastuzumab in HER2-positive metastatic breast cancer: a retrospective study at Institut Curie Hospitals.
Source: Research Square preprint supplement (doi:10.21203/rs.3.rs-1325343/v1), 2022-02-17
Supplement: Supplementary file 1 [file 631418464c283379bbc396e9.docx]

**Supplementary file 2:** Prior treatment before VP16-T

| Prior treatment | N = 42 |
| --- | --- |
| gemcitabine + trastuzumab | 7 |
| vinorelbine + trastuzumab | 6 |
| cyclophosphamide + trastuzumab | 5 |
| lapatinib + trastuzumab | 4 |
| carboplatin + trastuzumab | 4 |
| trastuzumab-emtansine | 4 |
| capecitabine + lapatinib | 3 |
| taxane + trastuzumab | 2 |
| liposomal anthracycline | 2 |
| oral cyclophosphamide | 2 |
| other | 3 |

*N=1 patient received VP16-T as first line therapy*
